FF-OCT for the diagnosis of GCA

1 **Full-field optical coherence tomography for the diagnosis of giant cell arteritis**

2 Thomas Maldiney<sup>1</sup>, H el ene Greigert<sup>1,2</sup>, Laurent Martin<sup>2,3</sup>, Emilie Benoit<sup>4</sup>, Catherine Creuzot-  
3 Garcher<sup>5</sup>, Pierre-Henry Gabrielle<sup>5</sup>, Jean-Marie Chassot<sup>6</sup>, Claude Boccara<sup>4,6</sup>, Daniel Balvay<sup>7</sup>,  
4 Bertrand Tavitian<sup>7,8</sup>, Olivier Cl ement<sup>7,8</sup>, Sylvain Audia<sup>1,2</sup>, Bernard Bonnotte<sup>1,2\*</sup>, Maxime  
5 Samson<sup>1,2\*</sup>

6 \* These authors contributed equally to this work

7 <sup>1</sup>Department of Internal Medicine and Clinical Immunology, Fran ois Mitterrand Hospital,  
8 Dijon University Hospital, 21000 Dijon, France

9 <sup>2</sup> Univ. Bourgogne Franche-Comt e, INSERM, EFS BFC, UMR1098, RIGHT Interactions  
10 Greffon-H ote-Tumeur/Ing enierie Cellulaire et G enique, F-21000 Dijon, France

11 <sup>3</sup>Department of Pathology, Fran ois Mitterrand Hospital, Dijon University Hospital, 21000  
12 Dijon, France

13 <sup>4</sup>LLTech SAS, 29 Rue du Faubourg Saint Jacques, 75014 Paris, France

14 <sup>5</sup>Department of Ophthalmology, Fran ois Mitterrand Hospital, Dijon University Hospital,  
15 21000 Dijon, France

16 <sup>6</sup>Institut Langevin, ESPCI Paris, CNRS, PSL University, 1 rue Jussieu, 75005 Paris, France

17 <sup>7</sup>Universit e de Paris, PARCC, INSERM, 75015 Paris, France

18 <sup>8</sup>Radiology Department, H opital Europ een Georges Pompidou, Universit e Paris Descartes  
19 Sorbonne Paris Cit e, Assistance Publique-H opitaux de Paris, Paris, France

20

21 **Conflict of interest statement**

22 All authors have no disclosure and no conflict of interest to declare. This work was supported  
23 by grants (MS) from the *Fondation ARTHRITIS* (2017-2018), the *Groupement Interr egional*

FF-OCT for the diagnosis of GCA

24 *de Recherche Clinique et d'Innovation Est (GIRCI), Appel à Projet Jeunes Chercheurs 2013*  
25 *and 2014 (Clinicaltrials.gov NCT02158208 and NCT02857192).*

26

27 **Corresponding author**

28 Maxime Samson, MD, PhD (Tel: +33 3 80 29 34 32, Fax: +33 3 80 29 38 46, Email:  
29 [maxime.samson@u-bourgogne.fr](mailto:maxime.samson@u-bourgogne.fr)), Department of Internal Medicine and Clinical  
30 Immunology, François Mitterrand Hospital, Dijon University Hospital, 21000 Dijon, France

31

32 **Word count for the main text : 2813**

33 **Number of text pages (17), tables (0), and figures (4)**

34

35

36

37

38

39

40

41

42

43

44

## FF-OCT for the diagnosis of GCA

### 45 **Abstract**

46 Histopathological examination of temporal artery biopsy (TAB) remains the gold standard for  
47 the diagnosis of giant cell arteritis (GCA) but is associated with essential limitations that  
48 emphasize the need for an upgraded pathological process. This study pioneered the use of  
49 full-field optical coherence tomography (FF-OCT) for rapid and automated on-site  
50 pathological diagnosis of GCA. Sixteen TABs (12 negative and 4 positive for GCA) were  
51 selected according to major histopathological criteria of GCA following hematoxylin-eosin-  
52 saffron-staining for subsequent acquisition with FF-OCT to compare structural modifications  
53 of the artery cell wall and thickness of each tunica. Gabor filtering of FF-OCT images was  
54 then used to compute TAB orientation maps and validate a potential automated analysis of  
55 TAB sections. FF-OCT allowed both qualitative and quantitative visualization of the main  
56 structures of the temporal artery wall, from the internal elastic lamina to the *vasa vasorum*  
57 and red blood cells, unveiling a significant correlation with conventional histology. FF-OCT  
58 imaging of GCA TABs revealed destruction of the media with distinct remodeling of the whole  
59 arterial wall into a denser reticular fibrous neo-intima, which is distinctive of GCA  
60 pathogenesis and accessible through automated Gabor filtering. Rapid on-site FF-OCT TAB  
61 acquisition makes it possible to identify some characteristic pathological lesions of GCA  
62 within a few minutes, paving the way for potential machine intelligence-based or even non-  
63 invasive diagnosis of GCA.

64

65 **Keywords** : full-field optical coherence tomography, giant cell arteritis, temporal artery  
66 biopsy

67

68

69

## FF-OCT for the diagnosis of GCA

### 70 **Introduction**

71 Giant cell arteritis (GCA) is a large vessel vasculitis that mainly affects the aorta and the  
72 branches of the external carotid, with a predilection for the temporal arteries(1). Even though  
73 we now have an accurate understanding of its complex pathogenesis, the causative agent of  
74 GCA is still unknown(2). Mostly occurring in northern European females between 50 and 80  
75 years old, the predominant cranial phenotype is usually revealed by new-onset headache,  
76 temporal artery tenderness, jaw claudication, and partial or complete visual loss associated  
77 with possible systemic symptoms, notably fever, weight loss and weakness(3). The critical  
78 complications of GCA include anterior ischemic optic neuropathy, stroke, aortic aneurysm or  
79 dissection; these serious complications being responsible for the prognosis of the disease  
80 and the need for prolonged high-dose glucocorticoid treatment(4).

81 The diagnosis of GCA usually relies on the association of concurrent clinical, biological and  
82 pathological features of vasculitis that are revealed by temporal artery biopsy (TAB)(5).  
83 Significant advances in the field of medical imaging have improved the assessment of the  
84 extent of vasculitis and refined non-invasive diagnosis and follow-up(6,7). For instance, the  
85 validity of hypoechoic thickening surrounding the temporal artery wall with color duplex  
86 sonography (CDS), also referred to as the halo sign, was confirmed at least three times in a  
87 meta-analysis for the diagnosis and follow-up of GCA(8). However, the combination of  
88 intense infiltration of mononuclear cells in the three layers of the artery, fragmentation of the  
89 internal elastic lamina (IEL), intimal hyperplasia and neoangiogenesis on TAB histological  
90 examination undoubtedly remains the gold standard for GCA diagnosis in all study group  
91 guidelines(9,10).

92 Apart from rare local complications(11), TAB is a safe procedure(12). Nevertheless, the  
93 segmental and focal nature of transmural inflammation in GCA generates skip lesions(13)  
94 and is responsible for a significant false-negative rate of up to 30%(14) that makes it  
95 necessary to either increase biopsy length(15) or to perform a contralateral TAB(16). These

## FF-OCT for the diagnosis of GCA

96 limitations emphasize the potential interest and need for an upgraded pathological procedure  
97 dedicated to the diagnosis of GCA.

98 Based upon optimization of the technology described by Fujimoto and colleagues in the early  
99 1990s,(17,18) full-field optical coherence tomography (FF-OCT) exploits *en face* white-light  
100 interference microscopy to provide not only ultra-high resolution images of biological  
101 structures(19) but also subcellular metabolic contrast in the tissue depth(20). Until now, most  
102 groups have focused on the potential role of FF-OCT during oncologic interventions as new  
103 routine approach to surgical pathology(21), and, except for one preliminary study in which  
104 the superficial temporal arteries were imaged with dermal OCT(22), there has been no  
105 reported attempt to employ high definition interference microscopy for the pathological  
106 diagnosis of GCA. The present work pursues the hypothesis that FF-OCT could help both  
107 the clinician and pathologist to improve TAB performance, and compares, for the first time,  
108 FF-OCT and conventional histological examination for the pathological diagnosis of GCA.

109

### 110 **Materials and Methods**

111 **Preparation of TAB sections.** This study was approved by the Institutional Review Board  
112 and the Ethics Committee of the Dijon University Hospital. All patients suspected of GCA and  
113 scheduled for TAB surgery at the Dijon University Hospital Ophthalmology department from  
114 January 2013 to December 2016 were included. All patients provided a signed written  
115 informed consent form before inclusion. TAB was performed according to standard  
116 procedure, and fresh biopsies were sent to the pathology department. A ten millimeter  
117 segment was used for conventional hematoxylin-eosin-saffron (HES) staining, and the other  
118 part of the artery segment was immediately frozen at -196°C in fetal bovine serum and  
119 dimethyl sulfoxide (10%). Samples were slowly defrosted, the surrounding tissue was  
120 removed, and transversal 1 mm-thick sections were cut with a triangular-bladed scalped and

## FF-OCT for the diagnosis of GCA

121 placed in complete RPMI culture medium before placement on the sample holder for FF-  
122 OCT imaging.

123 **Histological TAB selection.** A total of sixteen TABs were selected for subsequent analysis  
124 with optical coherence microscopy. Twelve negative TABs were identified according to the  
125 absence of mononuclear cell infiltrate, IEL fragmentation or neoangiogenesis and defined as  
126 the control TABs. In these control samples, the pathologist studied the qualitative aspect of  
127 the temporal artery wall to distinguish between negative TAB with normal intima (referred to  
128 as niTAB.1 to 9, n = 9) and negative TAB with intimal hyperplasia (referred to as ihTAB.1 to  
129 3, n = 3). These control TABs were compared to four specimens that met the major  
130 histopathological criteria for the diagnosis of GCA (referred to as gcaTAB.1 to 4, n = 4).

131 **FF-OCT imaging.** FF-OCT images were acquired with a commercially available FF-OCT  
132 apparatus (Light-CTScanner, LLTech SAS, Paris, France)(23). Briefly, illumination was  
133 provided by a LED source with short coherence length ensuring a sectioning ability or axial  
134 resolution of 1  $\mu\text{m}$ . In the FF-OCT set-up, 10x microscope objectives are placed in the  
135 interferometer arms in the Linnik configuration, bringing a transverse resolution of 1.5  $\mu\text{m}$ .  
136 Following full-field illumination of the axial TAB section, FF-OCT images were captured with  
137 a complementary metal oxide semiconductor camera. The theoretical penetration depth for  
138 the TAB specimen was approximately 200  $\mu\text{m}$ . The TAB section was placed in the dedicated  
139 sample holder with its revolution axis perpendicular to the imaging plane so that one FF-OCT  
140 slice showed the architecture of the TAB section from the lumen to the outer wall. A series of  
141 FF-OCT slices with 1.5  $\mu\text{m}$  spacing were recorded in depth, and ImageJ 1.52o software was  
142 used for axial reconstruction of TAB FF-OCT imaging.

143 **Image and statistical analysis.** Quantitative FF-OCT image analysis and tunica thickness  
144 were accessible with a contrast-based ImageJ 1.52o protocol (Plot Profile Function) and  
145 calculated as the mean of three representative measurements throughout each TAB section.  
146 NDP.view software version 2.6.17, provided by Hamamatsu, allowed similar measurements

## FF-OCT for the diagnosis of GCA

147 from scanned glass slides following HES staining. Statistics were calculated using GraphPad  
148 Prism version 5. For intima-to media ratios, values reported as medians and interquartile  
149 ranges were discriminated by Mann-Whitney tests. The Pearson  $r$  coefficient was calculated  
150 to evaluate the strength of the linear correlation between histology and FF-OCT  
151 measurements of media or intima thicknesses. Interval two-tailed  $P < 0.05$  was considered  
152 statistically significant. Finally, orientation maps were calculated for a selection of both  
153 healthy and GCA-positive TABs following Gabor filtering of the axial reconstructed images  
154 with a custom-made software based on Matlab 2018b (Matworks, Natick, MA).

155

## 156 **Results**

157 **Qualitative FF-OCT imaging.** Similar to histological preparation, TAB sections acquired with  
158 FF-OCT allow the identification of several important structures within the artery wall (Figure  
159 1). Notably, the tripartite architecture is perceived with a clear separation between intima,  
160 media and adventitia (Figure 1A). Interestingly, the physical junction between the intima and  
161 media appears as a thin hypo-reflective serpentine band that most obviously corresponds to  
162 the IEL (Figure 1A, black arrow). Moreover, in Figures 1B and C obtained with FF-OCT, the  
163 *vasa vasorum* can be seen distinctly within the arterial wall and the red blood cells can be  
164 identified precisely, returning a spherical contrast highly similar to the one obtained with  
165 conventional histology (Figure 1D to F). Indeed, the *vasa vasorum* display similar  
166 architecture with both techniques, revealing small (20 to 80  $\mu\text{m}$ ) blood vessels characterized  
167 by thin elastic walls and a round to oval shape directly inserted into the outlying thread of the  
168 temporal artery (*i.e.* mostly between the media and the adventitia layers) (Figures 1B and E,  
169 white arrow shows arterial thrombi). Magnification of the lumen of the *vasa vasorum* makes it  
170 possible to observe the red blood cells. These cells resemble partially transparent pink-  
171 colored ovoid structures following HES staining or a collection of iso-reflective dots with a

## FF-OCT for the diagnosis of GCA

172 surrounding hypo-reflective annulus on direct FF-OCT acquisition (Figures 1C and F, black  
173 asterisk).

174 FF-OCT acquisition and histological images from negative TAB samples are compared in  
175 Figures 2A to D. Figures 2A and B display a representative negative TAB specimen with a  
176 thin intimal layer (niTAB). Figures 2C and D show a negative TAB with intimal hyperplasia  
177 (hiTAB). No matter the group of negative TAB, the overall architecture of the vessels is  
178 preserved, and there is a clear distinction between intima, media and adventitia. Indeed, the  
179 tunica media displays a relative hyper-reflectivity on the image acquired with FF-OCT when  
180 compared with the tunica intima, whose thin muscle fibers mostly run parallel to the global  
181 circular orientation of the TAB section (see magnified region from Figures 2A and C). Similar  
182 conclusions regarding the differential contrast and circular symmetry within the two inner  
183 layers of the arterial wall separated by the IEL, which appears as a hypo-reflective strip in  
184 FF-OCT, can be drawn from the analysis of all negative TAB specimens (Supplemental  
185 Figures S1 and S2). In Figures 2A and C we can see that the tunica adventitia is constructed  
186 on a denser and more complex fibrous connective tissue that also seems to follow the overall  
187 circular symmetry of the system. When compared with Figure 2A, the FF-OCT-acquired TAB  
188 section from Figure 2C is characterized by an increased intima thickness (see magnified  
189 region). These observations can mostly be transposed for the comparison of all hiTAB  
190 specimens detailed in Supplemental Figures S1 and S2. The results obtained with FF-OCT  
191 analysis largely correlate with the data obtained after conventional histology (Figures 2B and  
192 D). Indeed, the intima in Figure 2B appears much thinner than in Figure 2D in which the  
193 intima is thicker than the media.

194 In figures 2E, 2F and S3, the TABs are positive for GCA. The conventional histopathological  
195 images show a relatively preserved media that is strongly infiltrated by T-cells, macrophages  
196 and multinucleated cells (see the magnified region from Figure 2F). By contrast, FF-OCT  
197 acquisition demonstrates a complete disruption of both regular reflectivity and circularity of  
198 the media and intima-associated connective tissue fibers due to the infiltration of



## FF-OCT for the diagnosis of GCA

199 inflammatory cells. This process remodels the structure of the artery into a denser, reticular,  
200 fibrous, collagen-rich structure responsible for both the progressive destruction of the media  
201 and the formation of a neo-intima (see the magnified region from Figure 2E). Figure 2E,  
202 obtained with FF-OCT, confirms the fragmentation of the internal elastic lamina along with a  
203 rebalancing of the contrasts throughout the netlike fibrous structure connecting all three  
204 layers. Similar to the corresponding image obtained with conventional histology (Figure 2F),  
205 there is no clear distinction between the intima and the media, which is consistent with the  
206 stage of the disease. The same conclusion can be drawn from Supplemental Figures S3,  
207 which shows the supporting material in which the reticular fibrous neo-intima almost  
208 completely obstructs the arterial lumen.

209 **Quantitative FF-OCT imaging.** Given that FF-OCT images provide good quality spatial  
210 resolution, we hypothesized that proper image analysis could return quantitative information  
211 regarding both the thickness of the artery wall layers and the global architecture of the  
212 underlying connective tissue. Figures 3A and B show the main aspects of contrast-based  
213 ImageJ protocol along a linear profile drawn across the arterial wall of a negative TAB  
214 section (Figure 3A). The protocol was designed to access the most precise measurements  
215 for each tunica of the vessel. The gray-scale plot profile from Figure 3B confirms a significant  
216 rupture in contrast between the intima and media, as well as between the media and  
217 adventitia, allowing concomitant measurements of the thickness of each artery wall layer.  
218 Software provided by Hamamatsu facilitated similar measurements from scanned glass  
219 slides following HES staining (data not shown). In addition, Gabor filtering was applied to the  
220 same reconstructed negative TAB section in order to provide vector orientation maps and  
221 subsequent global analysis of the symmetry of the arterial section (Figure 3C). As expected  
222 from the previous qualitative analysis, Gabor filtering of FF-OCT-acquired negative TAB  
223 section returned a perfect orientation match from one point of the artery to its exact opposite  
224 following a 180-degree rotation, as demonstrated by the paired color system respecting an  
225 overall 180-degree rotational symmetry. A similar procedure was applied for the analysis of

## FF-OCT for the diagnosis of GCA

226 the gray-scale plot profile from positive TAB sections (Figures 3D). Due to a high  
227 heterogeneous contrast within the whole TAB section of GCA patients, Figure 3E shows  
228 almost no possible distinction between the different layers composing the artery wall with a  
229 contrast oscillating between 500 and 2000 arbitrary units from the very inner to the outer  
230 layer. Subsequent Gabor filtering of the positive section proves the pathological loss of the  
231 180 degree rotational symmetry-based vector orientation match, as illustrated by the relative  
232 chaotic color distribution within the layers of the artery resulting in a rainbow-like appearance  
233 (Figure 3F).

234 Figure 4A shows an example of a negative TAB for which FF-OCT images and conventional  
235 histology match perfectly from the inner to the outer layer of the biopsy. Regardless of intima  
236 thickness or GCA status (when quantifiable for GCA patients), quantitative analysis of both  
237 intima and media thickness confirms the absence of statistical difference between FF-OCT-  
238 based and histology-based measurements of intima-to-media ratios (Figure 4B). Moreover,  
239 these results let to an accurate association of both quantitative classification and qualitative  
240 selection established by the pathologist for negative sections. Indeed, TABs with thin intima  
241 (Supplemental Figure S1) and TABs with intimal hyperplasia (Supplemental Figure S2)  
242 consequently appear as two separate groups: one with normal intima/media ratio (I/M) <1  
243 and another that shows an intimal hyperplastic response with I/M between 1 and 2. When  
244 data were accessible for TABs with GCA lesions, quantification brought out a third GCA  
245 group defined by I/M largely > 2. Finally, data from Figures 4C and D demonstrate a  
246 significant correlation between the thickness of the intima (Figure 4C) and media (Figure 4D)  
247 measured with FF-OCT and conventional histology.

248

## 249 Discussion

250 The present work describes the first attempt to assess the potential of FF-OCT for the  
251 diagnosis of GCA in comparison with conventional histology. The first advantage of FF-OCT

## FF-OCT for the diagnosis of GCA

252 is that it provides rapid (within minutes) and on-site acquisition of TAB sections. We  
253 demonstrate, from the analysis of both healthy and GCA-positive TAB sections, that the high  
254 spatial resolution of FF-OCT technology makes it possible to visualize with precision several  
255 essential structures correlated with the diagnosis of GCA. Notably, we found that FF-OCT  
256 accurately returns both qualitative and quantitative information relative to the structure of the  
257 three arterial tissue layers and the internal elastic lamina or *vasa vasorum*, with a significant  
258 correlation to histopathological imaging. When focusing on the FF-OCT analysis of healthy  
259 TAB sections, the inverted intima-to-media ratio can be interpreted as a reflection of the  
260 stage in human atherosclerosis(24). Moreover, we provide preliminary proof that automated  
261 Gabor filtering could deliver both immediate and essential structural information regarding  
262 the preservation of the regular circularity of the media and intima-associated connective  
263 tissues, paving the way for potential machine intelligence-based pathological diagnosis of  
264 GCA. FF-OCT acquisitions return additional and complementary information with focus on  
265 the appearance and structural orientation of the underlying fibrous supporting tissue within  
266 each layer of the temporal artery. When TABs from GCA patients were compared to the  
267 global circular symmetry of healthy TAB sections, FF-OCT imaging revealed the destruction  
268 of the media layer and the modification of the arterial wall structure, which was rearranged  
269 into a denser reticular fibrous neo-intima, distinctive of GCA pathogenesis(25). Despite the  
270 current success of non-invasive techniques like CDS, a precise FF-OCT-based analysis of  
271 the temporal artery wall on a meso-structural level remains of particular importance for the  
272 diagnosis of GCA. There is, however, a potential pitfall for GCA diagnosis with CDS since the  
273 atherosclerotic lesions responsible for significant increases in the thickness of the intima  
274 might mimic the halo sign, resulting in false positives(26).

275 We acknowledge several limitations that had an impact on the use of FF-OCT for rapid on-  
276 site pathological diagnosis of GCA in the current study. First, T-cells, macrophages and  
277 multinucleated cells, which are hallmarks of GCA, were not visible in the present set-up of  
278 FF-OCT, which used previously frozen TAB samples. Despite the high spatial resolution, the

## FF-OCT for the diagnosis of GCA

279 loss of information was due to the structural nature of contrast imaging, rendering direct  
280 black and white photographs of the specimen without any preparation or staining. However,  
281 this limitation is for the most part the result of using defrosted TAB samples with dead cellular  
282 material. This issue can be overcome by performing dynamic FF-OCT acquisition of fresh  
283 TAB sections, yielding complementary subcellular contrast(27) and putative direct  
284 visualization of inflammatory infiltrates. The potential of *en face* white-light interference  
285 microscopy demonstrated in this work should encourage further investigations into the FF-  
286 OCT-based handheld acquisition probe(28), a promising technology dedicated to direct  
287 transcutaneous imaging and further non-invasive diagnosis of GCA.

288 In conclusion, this preliminary study is the first to compare FF-OCT imaging to the gold  
289 standard histopathological procedure for the diagnosis of GCA. It brings conclusive proof  
290 regarding the potential of FF-OCT for both qualitative and quantitative structural visualization  
291 of underlying fibrous tissues and architectural changes in the arterial wall that occur  
292 throughout the inflammatory processes of GCA. After this first promising step, further  
293 investigations are warranted to confirm the potential of FF-OCT technology for rapid, on-site,  
294 non-invasive diagnosis of GCA.

295

### 296 **Acknowledgments**

297 The authors thank Suzanne Rankin for her help in proofreading the article ; Marion Ciudad,  
298 Marine Thébault, Claudie Cladière, Claire Gérard, Mathilde Charlot, Claire Boillin, Martine  
299 Breton, Amandine Esnault, Thibault Ghesquière and Laetitia Barbier for their help in  
300 collecting samples ; Céline Shaeffer, Eva Michaud and the Centre de Ressources  
301 Biologiques ; Ferdinand Cabanne for their help in the conservation of frozen samples.

302

### 303 **Statement of author contributions**

## FF-OCT for the diagnosis of GCA

304 T. M. designed research, performed research, analyzed data and wrote the paper. H. G.  
305 performed research. L. M. analyzed data. E. B. performed research and analyzed data. C.  
306 C.-G. analyzed data. PH. G. analyzed data. JM. C. performed research and analyzed data.  
307 C. B. designed research and performed research. D. B. performed research and analyzed  
308 data. B. T. analyzed data. O. C. analyzed data. S. A. designed research. B. B. designed  
309 research, analyzed data, and wrote the paper. M. S. designed research, performed research,  
310 analyzed data and wrote the paper.

311 M. S. is the guarantor of this work and, as such, had full access to all of the data in the study  
312 and takes responsibility for the integrity of the data and the accuracy of the data analysis.

313

## 314 **References**

- 315 1. Jennette JC, Falk RJ, Bacon PA, Basu N, Cid MC, Ferrario F, et al. 2012 Revised  
316 International Chapel Hill Consensus Conference Nomenclature of Vasculitides. *Arthritis*  
317 *Rheum.* 2013 Jan;65(1):1–11.
- 318 2. Samson M, Corbera-Bellalta M, Audia S, Planas-Rigol E, Martin L, Cid MC, et al.  
319 Recent advances in our understanding of giant cell arteritis pathogenesis. *Autoimmun*  
320 *Rev.* 2017 Aug;16(8):833–44.
- 321 3. Dejaco C, Brouwer E, Mason JC, Buttgereit F, Matteson EL, Dasgupta B. Giant cell  
322 arteritis and polymyalgia rheumatica: current challenges and opportunities. *Nat Rev*  
323 *Rheumatol.* 2017 Oct;13(10):578–92.
- 324 4. Weyand CM, Goronzy JJ. Giant-Cell Arteritis and Polymyalgia Rheumatica. Solomon  
325 CG, editor. *N Engl J Med.* 2014 Jul 3;371(1):50–7.
- 326 5. Buttgereit F, Dejaco C, Matteson EL, Dasgupta B. Polymyalgia Rheumatica and Giant  
327 Cell Arteritis: A Systematic Review. *JAMA.* 2016 Jun 14;315(22):2442.

FF-OCT for the diagnosis of GCA

- 328 6. Rinagel M, Chatelus E, Jousse-Joulin S, Sibilia J, Gottenberg J-E, Chasset F, et al.  
329 Diagnostic performance of temporal artery ultrasound for the diagnosis of giant cell  
330 arteritis: a systematic review and meta-analysis of the literature. *Autoimmun Rev.* 2019  
331 Jan;18(1):56–61.
- 332 7. Dejaco C, Ramiro S, Duftner C, Besson FL, Bley TA, Blockmans D, et al. EULAR  
333 recommendations for the use of imaging in large vessel vasculitis in clinical practice.  
334 *Ann Rheum Dis.* 2018 May;77(5):636–43.
- 335 8. Monti S, Floris A, Ponte C, Schmidt WA, Diamantopoulos AP, Pereira C, et al. The use  
336 of ultrasound to assess giant cell arteritis: review of the current evidence and practical  
337 guide for the rheumatologist. *Rheumatology.* 2018 Feb 1;57(2):227–35.
- 338 9. Bienvenu B, Ly KH, Lambert M, Agard C, André M, Benhamou Y, et al. Management of  
339 giant cell arteritis: Recommendations of the French Study Group for Large Vessel  
340 Vasculitis (GEFA). *Rev Médecine Interne.* 2016 Mar;37(3):154–65.
- 341 10. Sait MR, Lepore M, Kwasnicki R, Allington J, Balasubramanian R, Somasundaram SK,  
342 et al. The 2016 revised ACR criteria for diagnosis of giant cell arteritis – Our case  
343 series: Can this avoid unnecessary temporal artery biopsies? *Int J Surg Open.*  
344 2017;9:19–23.
- 345 11. Gunawardene A, Chant H. Facial nerve injury during temporal artery biopsy. *Ann R Coll*  
346 *Surg Engl.* 2014 May;96(4):257–60.
- 347 12. Pieri A, Milligan R, Hegde V, Hennessy C. Temporal artery biopsy: are we doing it  
348 right? *Int J Health Care Qual Assur.* 2013 Jul 12;26(6):559–63.
- 349 13. Poller DN. The importance of skip lesions in temporal arteritis. *J Clin Pathol.* 2000 Feb  
350 1;53(2):137–9.

FF-OCT for the diagnosis of GCA

- 351 14. Neshar G. The diagnosis and classification of giant cell arteritis. *J Autoimmun.* 2014  
352 Feb;48–49:73–5.
- 353 15. Oh LJ, Wong E, Gill AJ, McCluskey P, Smith JEH. Value of temporal artery biopsy  
354 length in diagnosing giant cell arteritis: TAB length in GCA diagnosis. *ANZ J Surg.* 2018  
355 Mar;88(3):191–5.
- 356 16. Boyev LR, Miller NR, Green WR. Efficacy of unilateral versus bilateral temporal artery  
357 biopsies for the diagnosis of giant cell arteritis. *Am J Ophthalmol.* 1999 Aug;128(2):211–  
358 5.
- 359 17. Huang D, Swanson EA, Lin CP, Schuman JS, Stinson WG, Chang W, et al. Optical  
360 coherence tomography. *Science.* 1991 Nov 22;254(5035):1178–81.
- 361 18. Fujimoto JG, Brezinski ME, Tearney GJ, Boppart SA, Bouma B, Hee MR, et al. Optical  
362 biopsy and imaging using optical coherence tomography. *Nat Med.* 1995 Sep;1(9):970–  
363 2.
- 364 19. Vabre L, Dubois A, Boccara AC. Thermal-light full-field optical coherence tomography.  
365 *Opt Lett.* 2002 Apr 1;27(7):530–2.
- 366 20. Apelian C, Harms F, Thouvenin O, Boccara AC. Dynamic full field optical coherence  
367 tomography: subcellular metabolic contrast revealed in tissues by interferometric  
368 signals temporal analysis. *Biomed Opt Express.* 2016 Apr 1;7(4):1511.
- 369 21. van Manen L, Dijkstra J, Boccara C, Benoit E, Vahrmeijer AL, Gora MJ, et al. The  
370 clinical usefulness of optical coherence tomography during cancer interventions. *J*  
371 *Cancer Res Clin Oncol.* 2018 Oct;144(10):1967–90.
- 372 22. Mollan SP, Keane PA, Denniston AK. The use of transdermal optical coherence  
373 tomography to image the superficial temporal arteries. *Eye.* 2017 Jan;31(1):157–60.

FF-OCT for the diagnosis of GCA

- 374 23. Ghouali W, Grieve K, Bellefqih S, Sandali O, Harms F, Laroche L, et al. Full-Field  
375 Optical Coherence Tomography of Human Donor and Pathological Corneas. *Curr Eye*  
376 *Res.* 2015 May 4;40(5):526–34.
- 377 24. Hazell LJ, Baerenthaler G, Stocker R. Correlation between intima-to-media ratio,  
378 apolipoprotein B-100, myeloperoxidase, and hypochlorite-oxidized proteins in human  
379 atherosclerosis. *Free Radic Biol Med.* 2001 Nov;31(10):1254–62.
- 380 25. Samson M, Bonnotte B. Artérite à cellules géantes : nouveaux concepts. *Presse*  
381 *Médicale.* 2019 Sep;48(9):917–8.
- 382 26. De Miguel E, Beltran LM, Monjo I, Deodati F, Schmidt WA, Garcia-Puig J.  
383 Atherosclerosis as a potential pitfall in the diagnosis of giant cell arteritis.  
384 *Rheumatology.* 2018 Feb 1;57(2):318–21.
- 385 27. Thouvenin O, Fink M, Boccara C. Dynamic multimodal full-field optical coherence  
386 tomography and fluorescence structured illumination microscopy. *J Biomed Opt.* 2017  
387 Feb 14;22(2):026004.
- 388 28. Benoit a la Guillaume E, Martins F, Boccara C, Harms F. High-resolution handheld rigid  
389 endomicroscope based on full-field optical coherence tomography. *J Biomed Opt.* 2016  
390 Feb 8;21(2):026005.

391

392 **Figure captions**

393 **Figure 1. TAB architecture imaging.** Arterial wall (A, D), vasa vasorum (B, E) and red blood  
394 cells (C, F) imaging with FF-OCT (A to C) and conventional histology following HES staining  
395 (D to F). Scale bar represents 50  $\mu$ m. Black arrow shows IEL. White arrow shows arterial  
396 thrombus. Asterisk marks red blood cells. Legend : a, adventitia ; i, intima ; m, media.

397



## FF-OCT for the diagnosis of GCA

398 **Figure 2. Qualitative imaging of TAB specimens.** Comparison of FF-OCT (A, C, E) and  
399 conventional histology (B, D, F) imaging. A and B corresponds to niTABs (n = 9), C and D to  
400 ihTABs (n = 3), E and F to gcaTABs (n = 4). Scale bar represents 100  $\mu$ m. Black arrow  
401 shows the IEL, white arrow shows rupture of the circular symmetry and mononuclear  
402 infiltrate). Legend : a, adventitia ; i, intima ; m, media.

403

404 **Figure 3. Image analysis of TAB sections.** ihTAB1 FF-OCT translational section for  
405 ImageJ graphical plot (A). ImageJ graphical plot of ihTAB1 FF-OCT translational section (B).  
406 Orientation maps after Gabor filtering of ihTAB1 FF-OCT translational section (C). gcaTAB3  
407 FF-OCT translational section for ImageJ graphical plot (D). ImageJ graphical plot of  
408 gcaTAB3 FF-OCT translational section (E). Orientation maps after Gabor filtering of  
409 gcaTAB3 FF-OCT translational section (F).

410

411 **Figure 4. Quantitative analysis of TAB sections.** FF-OCT and conventional histology  
412 cross-sectional match for the visualization of temporal artery wall (A). Comparison of FF-OCT  
413 and conventional histology-based intima-to-media ratios for both healthy and GCA-positive  
414 TAB sections (B). Correlation curves between FF-OCT and conventional histology for the  
415 measurement of intima (C) and media (D) thickness. Scale bar represents 100  $\mu$ m.

416

### 417 **Supplementary Figure captions**

418 **Figure S1. Qualitative imaging of healthy TAB specimens with thin intima layer (n = 9).**  
419 Comparison of FF-OCT (A, C, E, G, I, K, M, O, Q) and conventional histology (B, D, F, H, J,  
420 L, N, P, R) imaging. A and B correspond to niTAB1, C and D to niTAB2, E and F to niTAB3,  
421 G and H to niTAB4, I and J to niTAB5, K and L to niTAB5, M and N to niTAB7, O and P to  
422 niTAB8, Q and R to niTAB9.

FF-OCT for the diagnosis of GCA

423

424 **Figure S2. Qualitative imaging of healthy TAB specimens with significant intimal**  
425 **hyperplasia** (n = 3). Comparison of FF-OCT (A, C, E) and conventional histology (B, D, F)  
426 imaging. A and B correspond to the ihTAB1, C and D to ihTAB2, E and F to ihTAB3.

427

428 **Figure S3. Qualitative imaging of GCA TAB specimens** (n = 4). Comparison of FF-OCT  
429 (A, C, E, G) and conventional histology (B, D, F, H) imaging. A and B correspond to  
430 gcaTAB1, C and D to gcaTAB2, E and F to gcaTAB3, G and H to gcaTAB4.

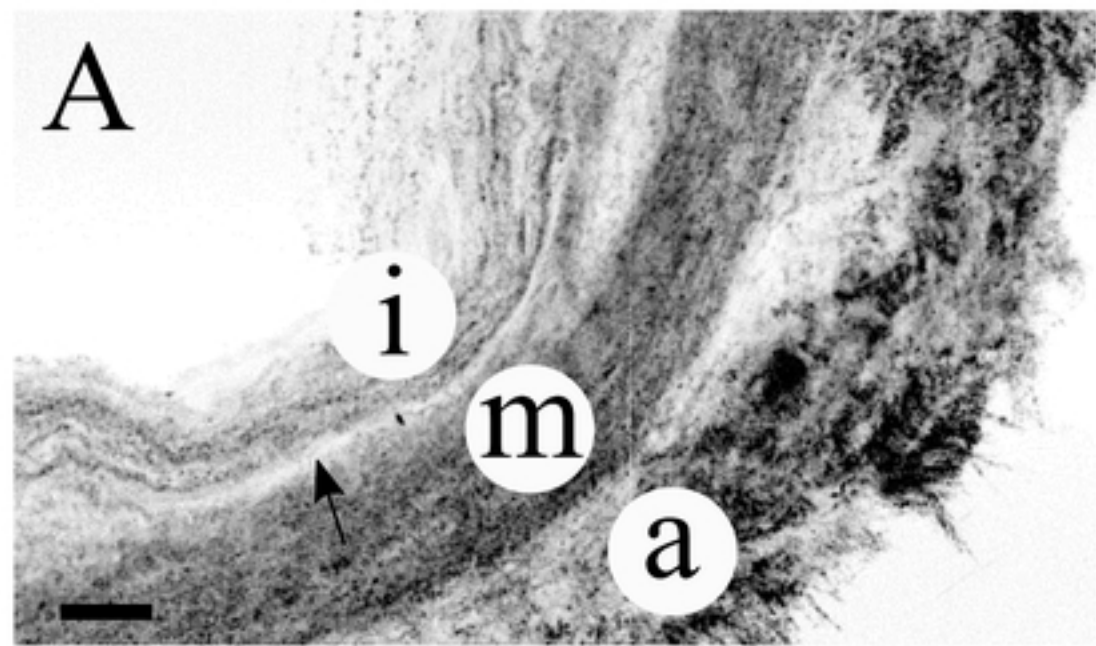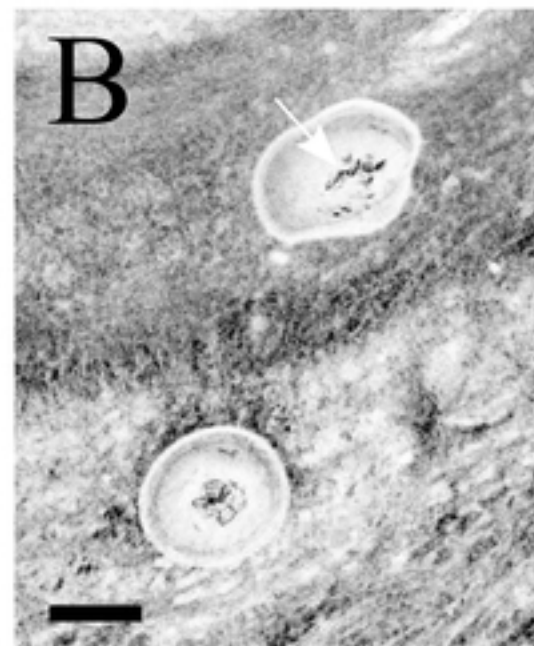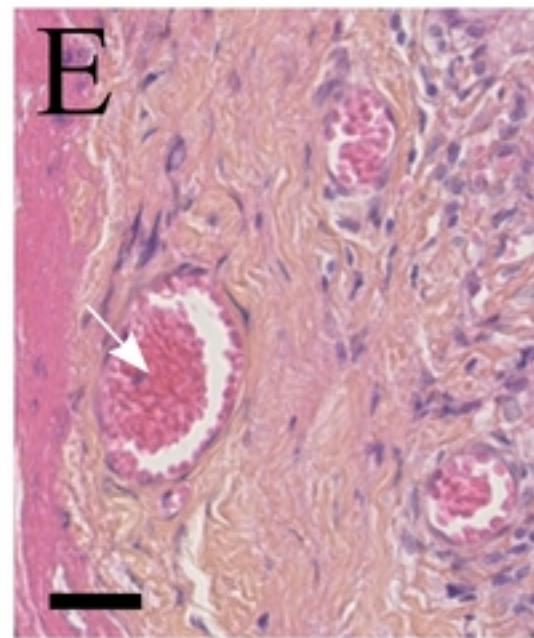

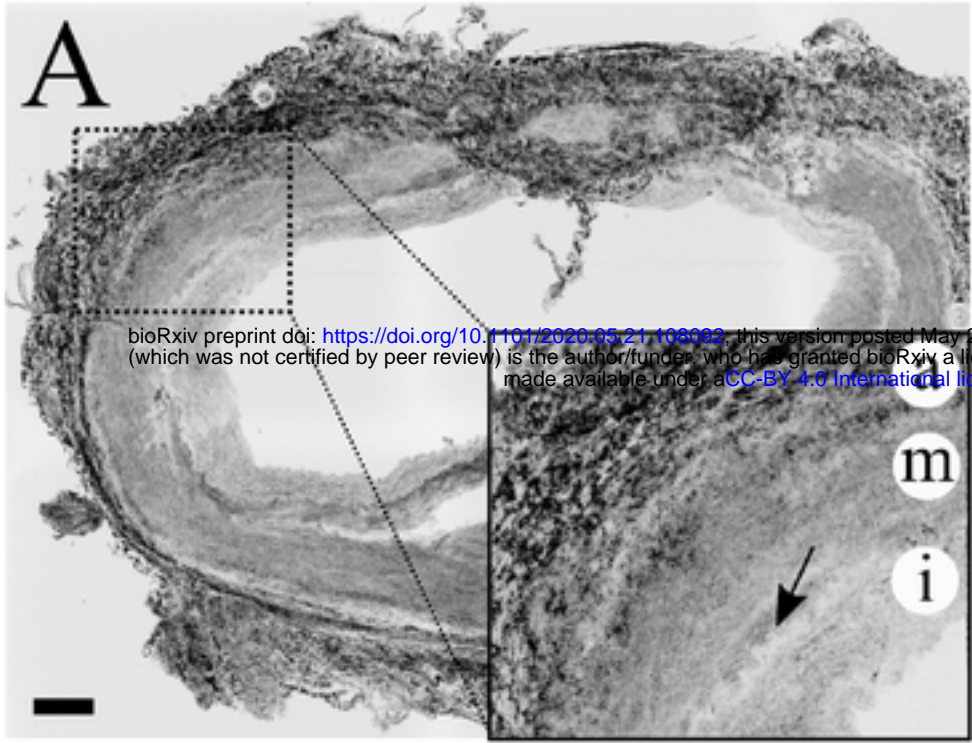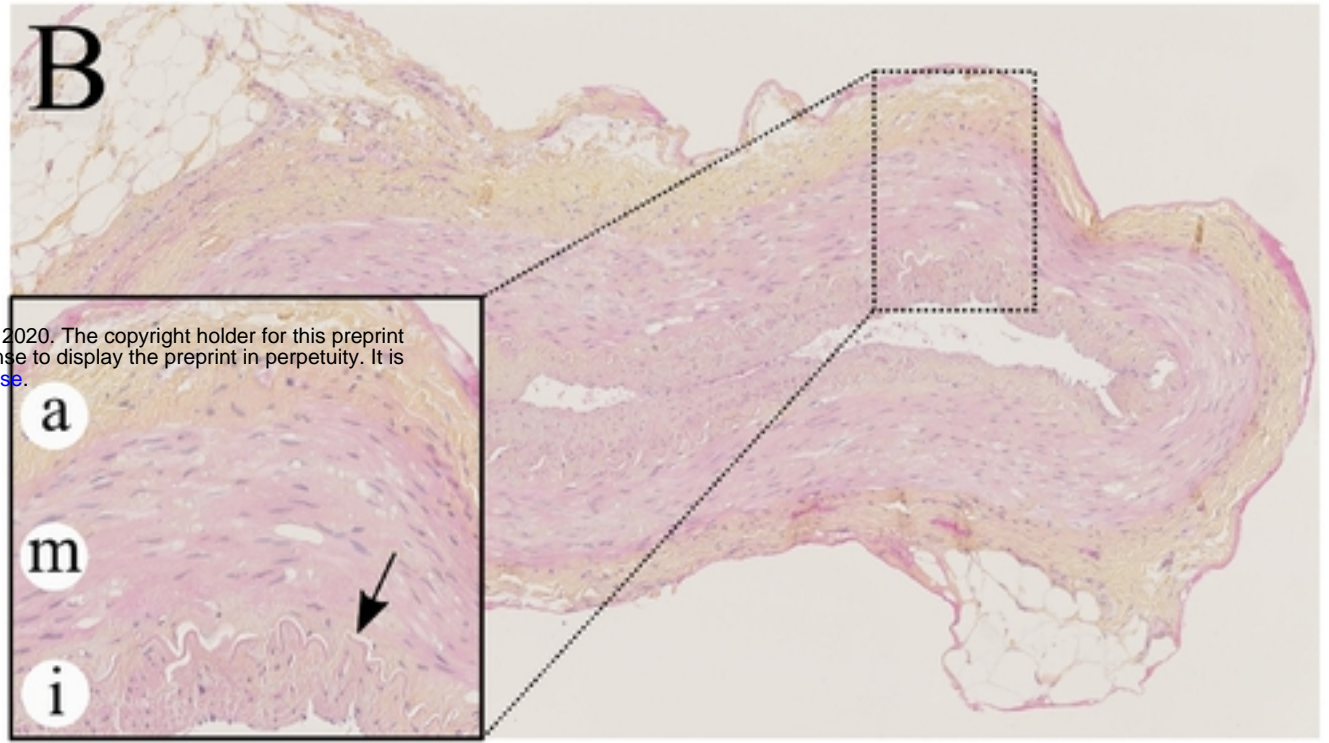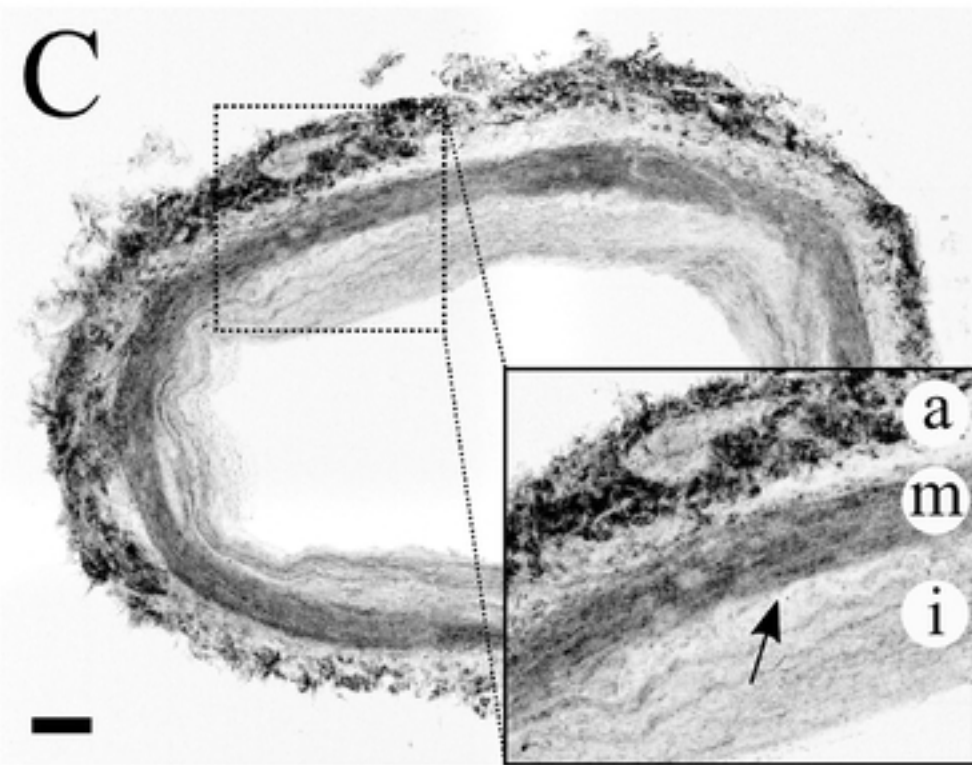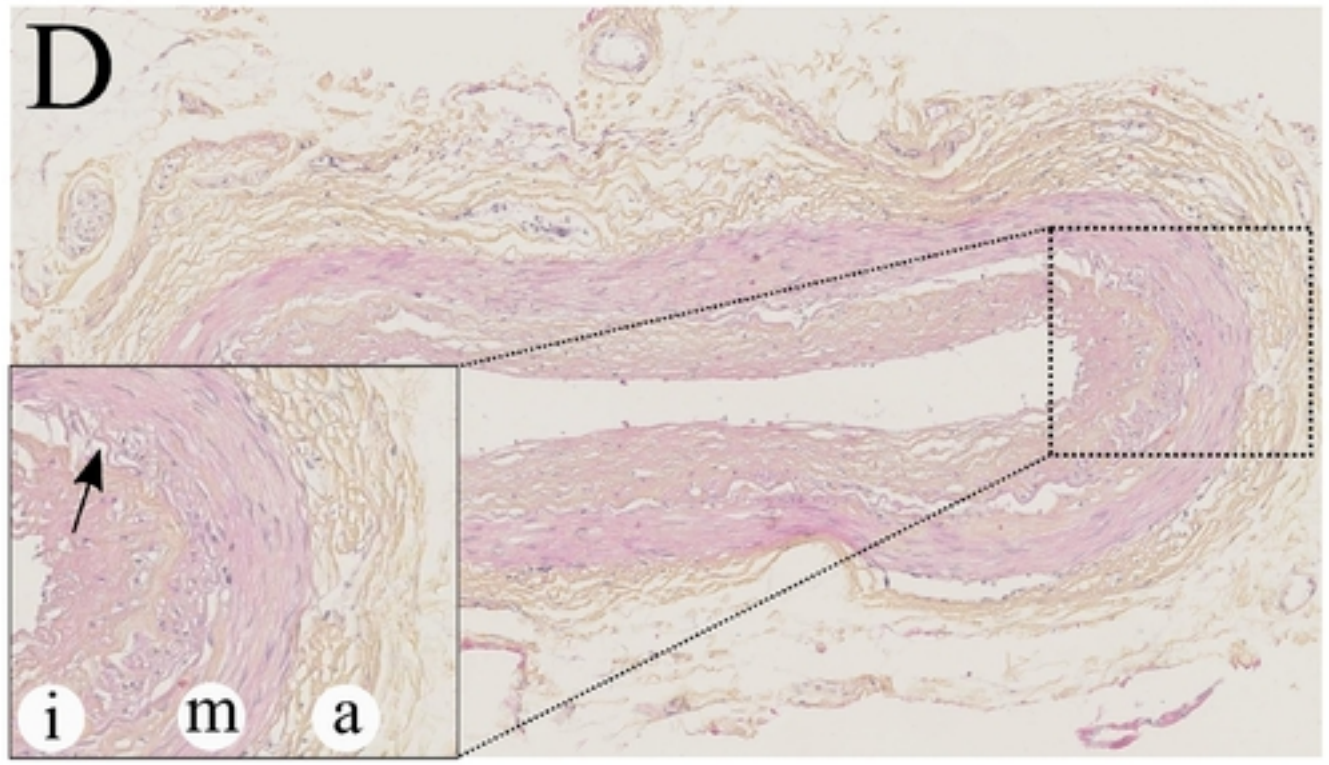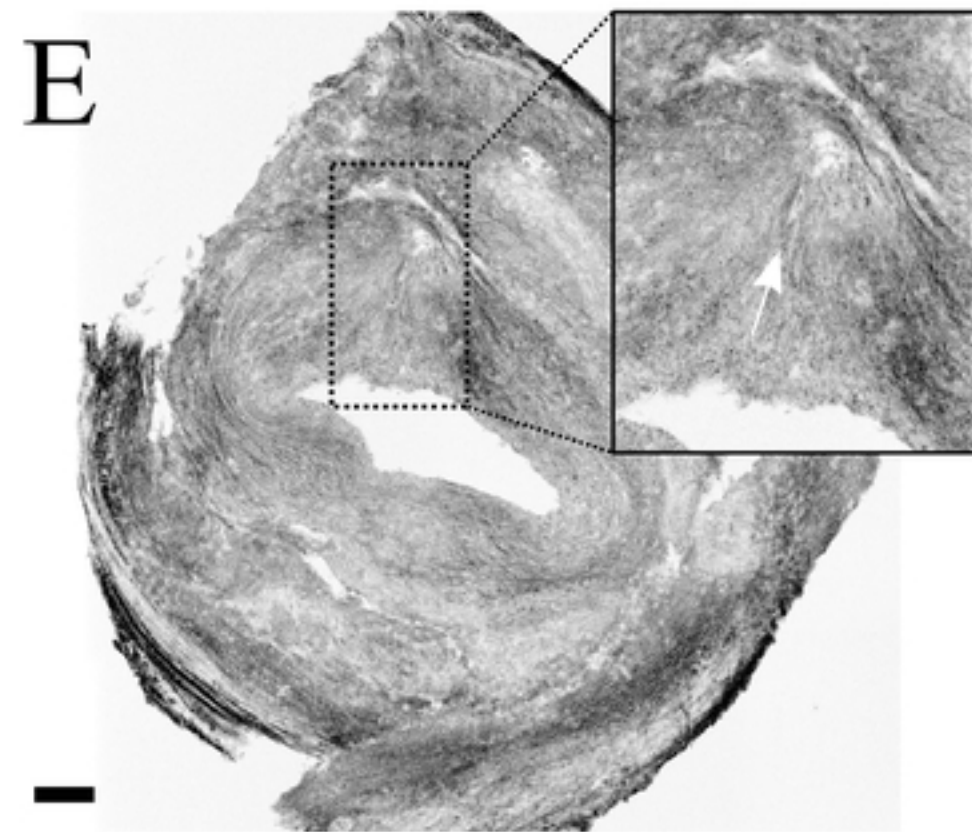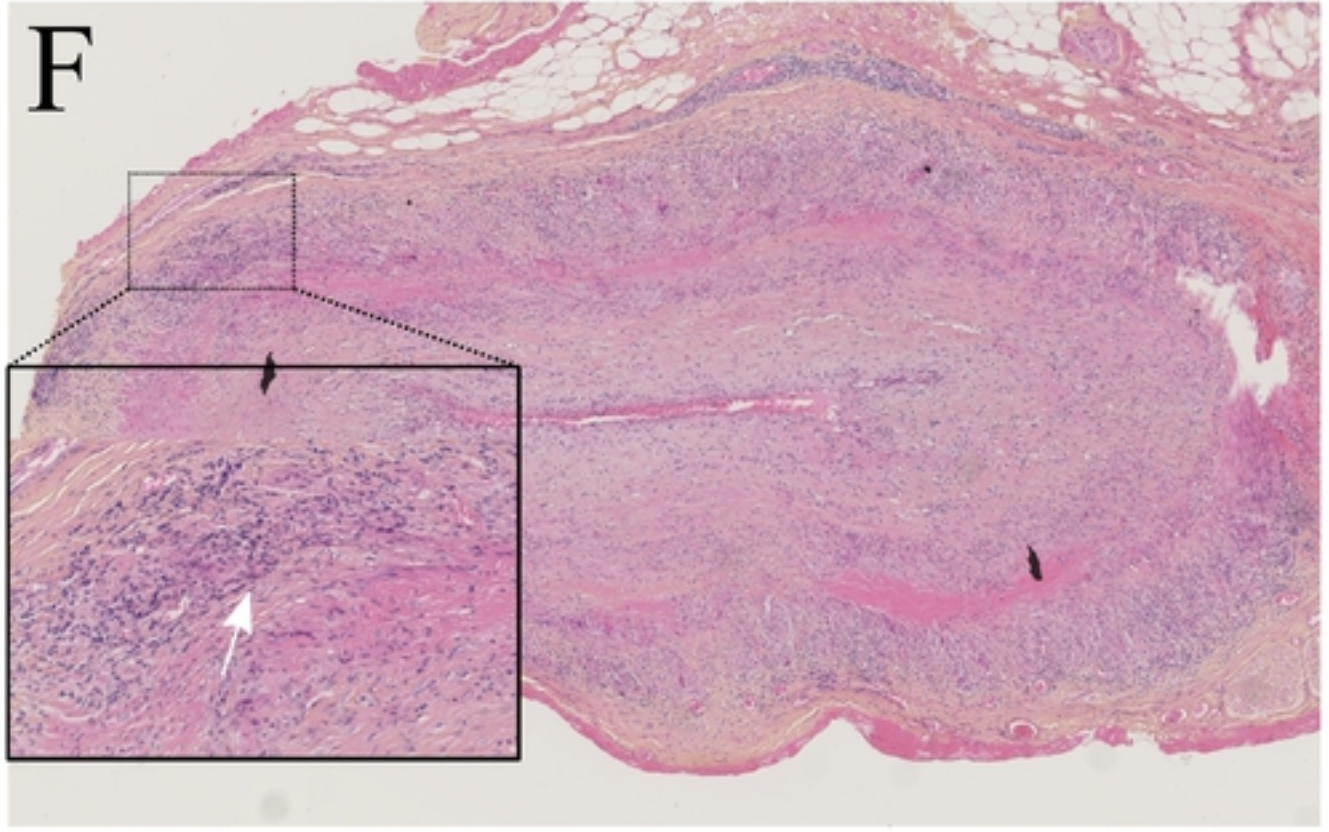

Figure 2

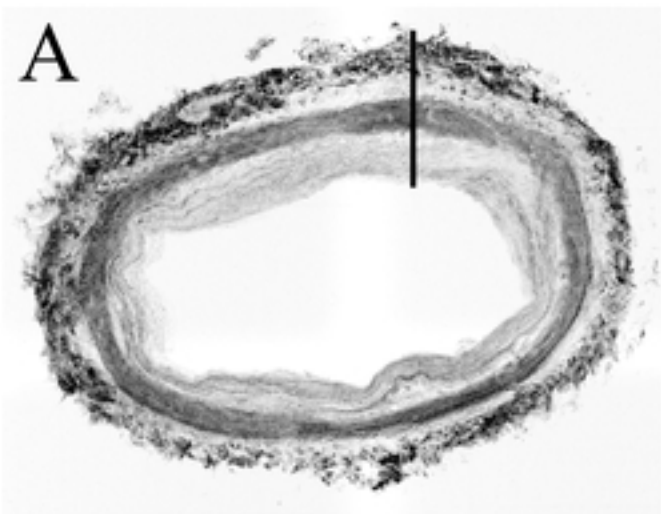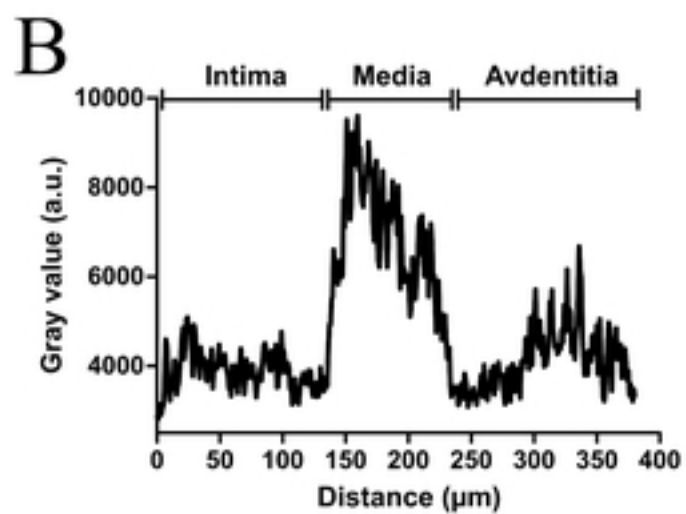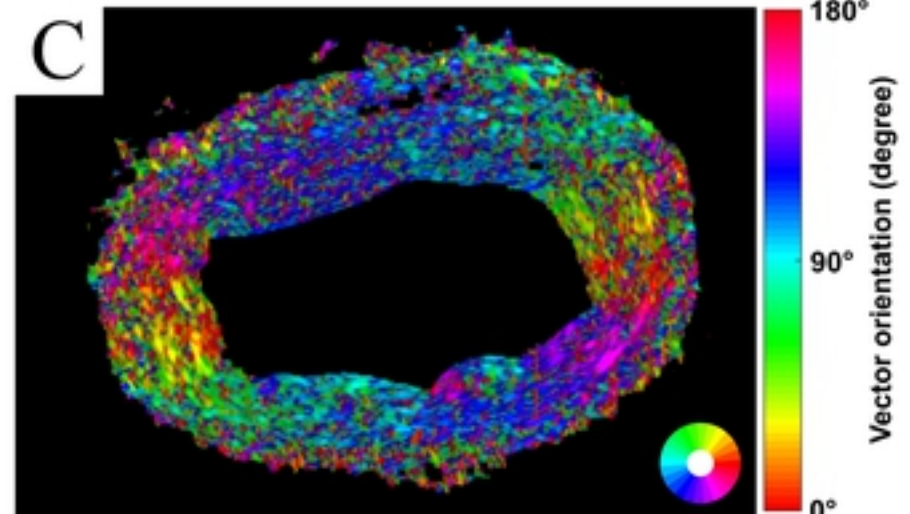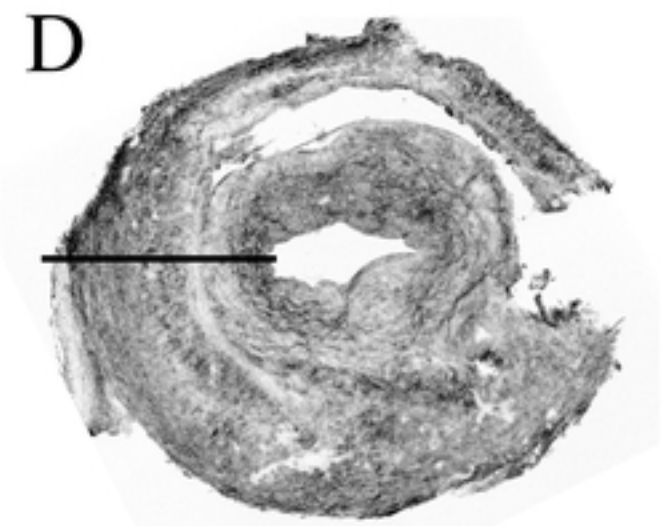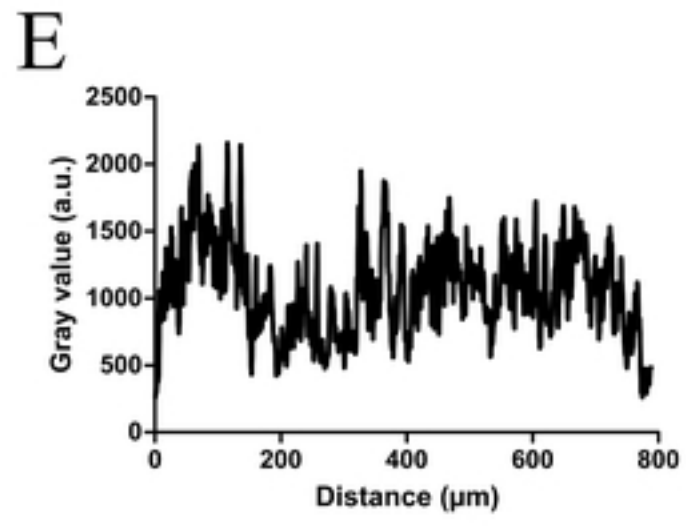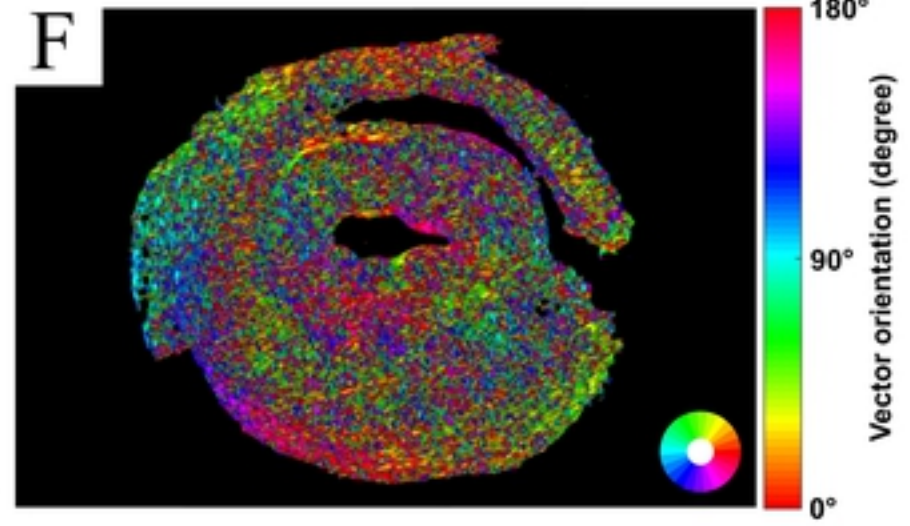

Figure 3

**A**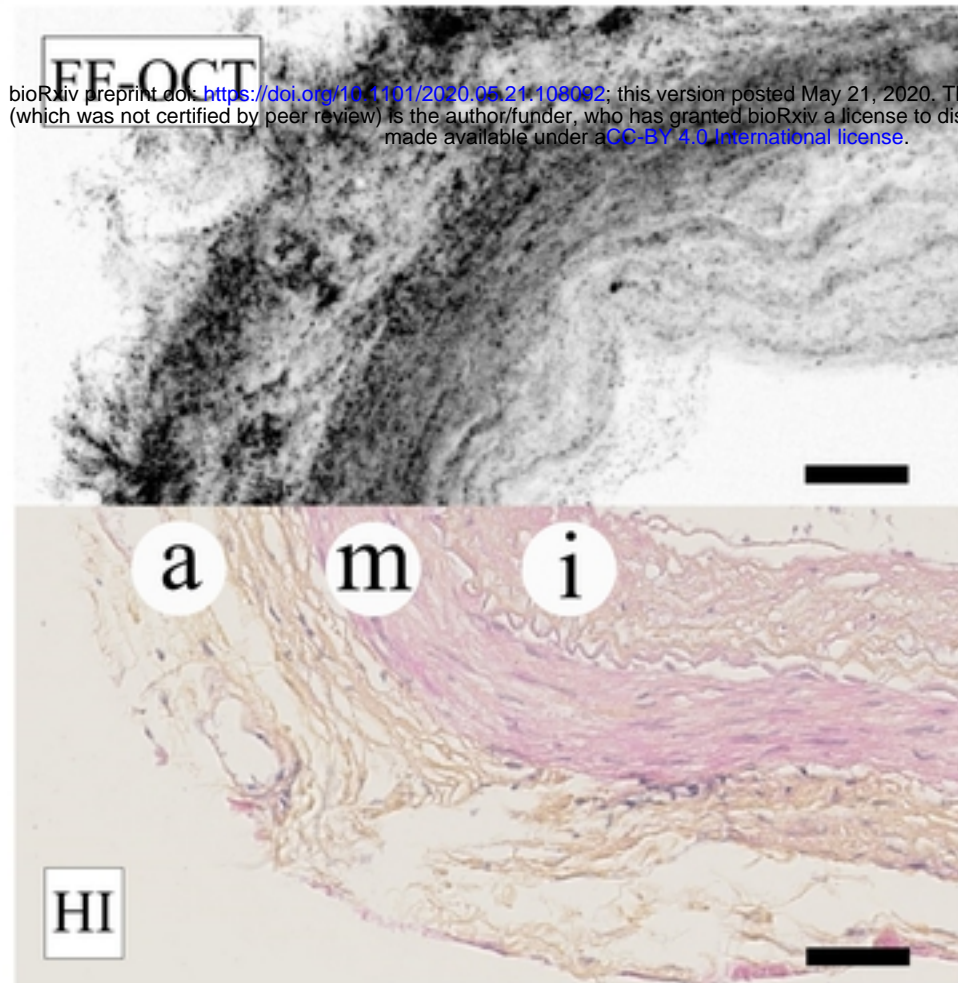**B**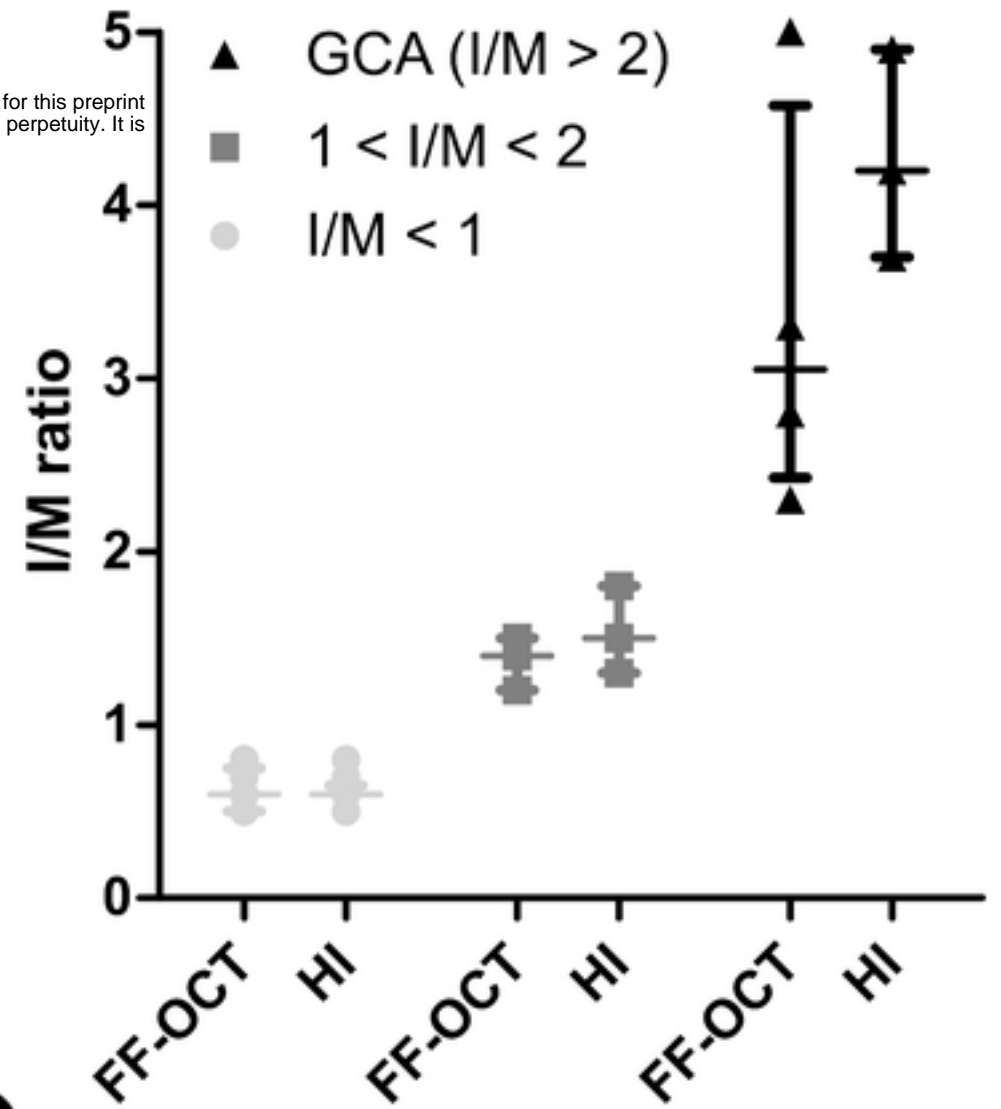**C**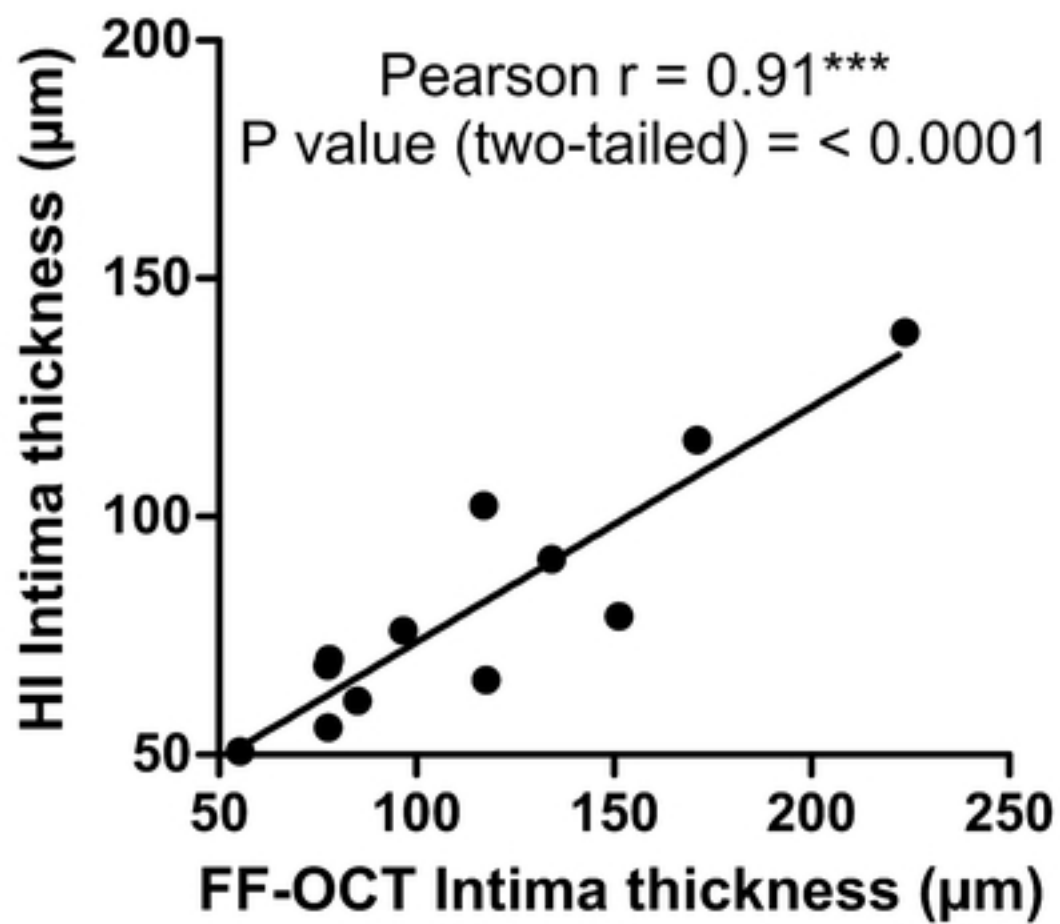**D**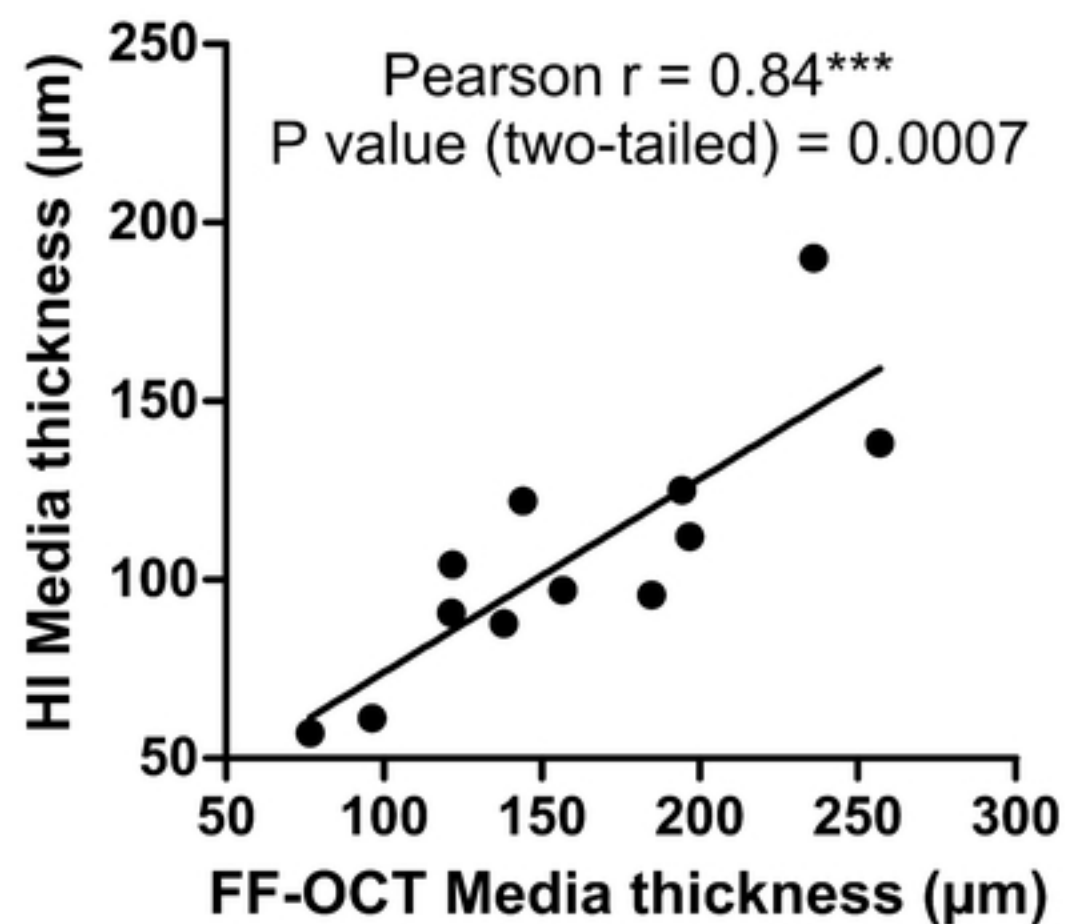

Figure 4
